# Supplementary material for: Transcriptome sequencing reveals maelstrom as a novel target gene of the terminal system in the red flour beetle Tribolium castaneum
Source: Oxford University Press journal article supplement (doi:10.1242/dev.136853), 2017-02-24
Supplement: dev136853supp.pdf [file dev136853supp.pdf]

## Supplementary Figures

**Figure S1: phenotypic analysis of *Tc-cic* RNAi experiments**

A)

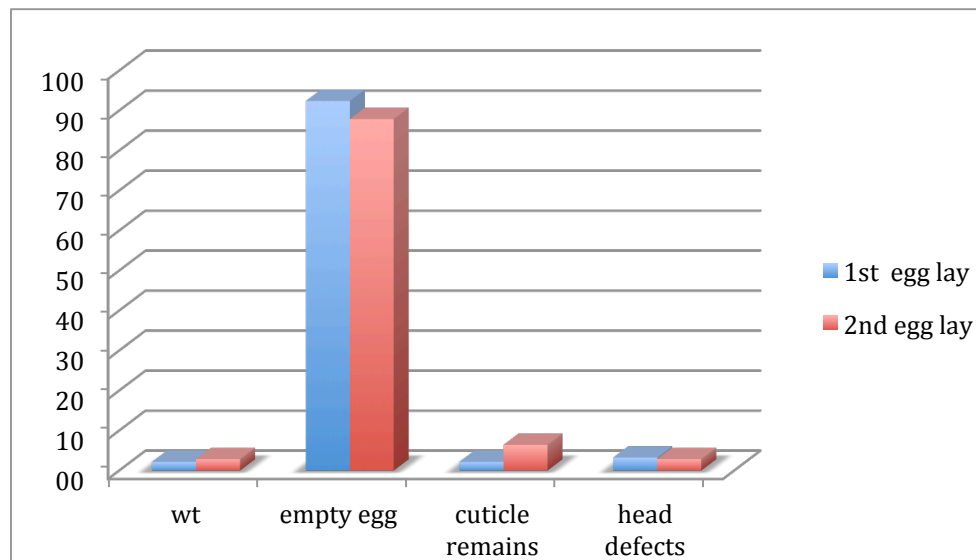

| RNAi phenotypes (%) | 1st egg lay | 2nd egg lay |
|---------------------|-------------|-------------|
| wt                  | 2,2         | 2,9         |
| empty egg           | 92,4        | 87,9        |
| cuticle remains     | 2,2         | 6,4         |
| head defects        | 3,3         | 2,9         |

B)

| RNAi (n)        | 1st egg lay | 2nd egg lay |
|-----------------|-------------|-------------|
| wt              | 2           | 4           |
| empty egg       | 85          | 123         |
| cuticle remains | 2           | 9           |
| head defects    | 3           | 4           |
| total           | 92          | 140         |

Summary of RNAi experiments. Percentages (A) and numbers (B) of the observed phenotypic defects obtained with RNAi treatments using *Tc-cic* dsRNA (1µg /µl).

Figure S1: Phenotypic analysis of *Tc-cic* RNAi experiments

Summary of RNAi experiments. Percentages (A) and numbers (B) of the observed phenotypic defects obtained with RNAi treatments using *Tc-cic* dsRNA (1µg /µl). Eggs were collected between the 10th and 13th day (1. egg lay) and 13th and 16th (2. egg lay) day post injection.

**Figure S2: phenotypic analysis of *Tc-mael* RNAi experiments**

A)

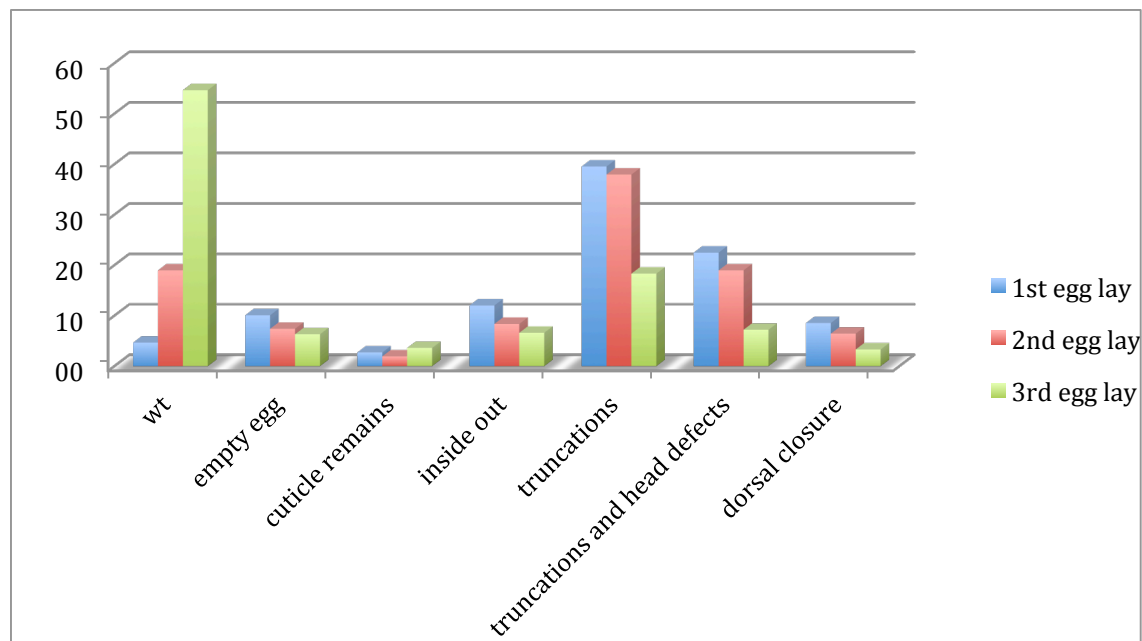

| RNAi phenotypes (%)          | 1st egg lay | 2nd egg lay | 3rd egg lay |
|------------------------------|-------------|-------------|-------------|
| wt                           | 4,7         | 19,0        | 54,7        |
| empty egg                    | 10,1        | 7,4         | 6,3         |
| cuticle remains              | 2,7         | 1,9         | 3,6         |
| inside out                   | 12,0        | 8,4         | 6,6         |
| truncations                  | 39,5        | 37,9        | 18,3        |
| truncations and head defects | 22,5        | 19,0        | 7,2         |
| dorsal closure               | 8,5         | 6,4         | 3,3         |

B)

| RNAi Phenotypes (n)          | 1st egg lay | 2nd egg lay | 3rd egg lay |
|------------------------------|-------------|-------------|-------------|
| wt                           | 12          | 59          | 182         |
| empty egg                    | 26          | 23          | 21          |
| cuticle remains              | 7           | 6           | 12          |
| inside out                   | 31          | 26          | 22          |
| truncations                  | 102         | 118         | 61          |
| truncations and head defects | 58          | 59          | 24          |
| dorsal closure               | 22          | 20          | 11          |
| total                        | 258         | 311         | 333         |

Summary of RNAi experiments. Percentages (A) and numbers (B) of the observed phenotypic defects obtained with RNAi treatments using *Tc-mael* dsRNA (1µg/µl).

**Figure S2: phenotypic analysis of *Tc-mael* RNAi**

Summary of RNAi experiments. Percentages (A) and numbers (B) of the observed phenotypic defects obtained with RNAi treatments using *Tc-mael* dsRNA (1µg/µl). Eggs were collected between the 10th and 13th day (1. egg lay) and 13th and 16th (2. egg lay) day post injection.

## Table S1: Differential expression screen

Relative expression values for wildtype (T1), tsl RNAi (T2), and cic RNAi (T3) as revealed by SOLiD Next Generation Sequencing. In total, 12,795 genes showed differences in mRNA expression levels. All genes were categorized according to their expression values. We found 1801 genes to be up-regulated in Tc-tsl RNAi and down-regulated in Tc-cic RNAi (class: +/-) and 2790 genes that were up-regulated in Tc-cic RNAi but down-regulated in Tc-tsl RNAi (class: -/+). In addition, 2157 genes were up-regulated (class: ++) in both, Tc-cic and Tc-tsl RNAi and 4589 genes down-regulated (class: --) in both, Tc-cic and Tc-tsl RNAi. Some genes that were not expressed in wildtype became expressed after Tc-tsl (class: +0) or Tc-cic RNAi (class: 0+).

[Click here to Download Table S1](#)

## Table S2: Summary of the candidate-gene screen

50 genes were selected for closer analysis. Relative fold change (T2 or T3 divided by T1) in tsl RNAi (T2) or cic RNAi (T3) is shown in comparison to wildtype (T1) (tsl RNAi vs wt: T2:T1, cic RNAi vs wt: T3:T1) Larvae were scored for RNAi phenotypes. Hoechst and  $\beta$ -Tubulin staining were used to visualize early embryonic phenotypes ("early defects"). Expression of candidate genes was monitored by whole-mount in-situ hybridisation.

[Click here to Download Table S2](#)

## Supplementary Movies

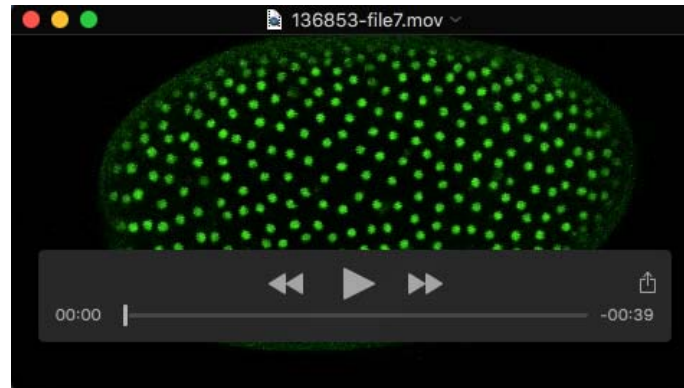

### Movie S1: Live imaging of early wildtype embryo

12 hours Time-lapse fluorescence recording of a *Tribolium* embryo expressing nuclear-localized GFP under a ubiquitous promoter (transgenic line EFA-nGFP). Stacks were recorded every 12 minutes at 10x magnification and 20°C. After synchronous cell divisions, the embryonic anlagen condense and give rise to germ-rudiment that progressively becomes covered by the extending serosa. The germ-band extends posteriorly, bending around the posterior pole. Anterior to the left.

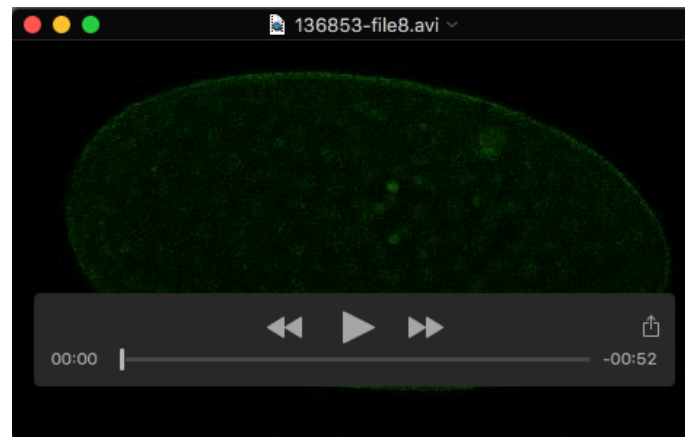

### Movie S2: Live imaging of early *Tc-capicua* RNAi embryo

12 hours Time-lapse fluorescence recording of a *Tribolium* embryo expressing nuclear-localized GFP under a ubiquitous promoter (transgenic line EFA-nGFP). Stacks were recorded every 12 minutes at 10x magnification and 20°C. Upon *Tc-cic* depletion, the serosa anlagen expands at the expense of the anterior head anlagen. Eventually extraembryonic membranes cover the entire egg. Embryonic tissue is restricted to the posterior pole of the egg and becomes internalized completely. Anterior to the left.

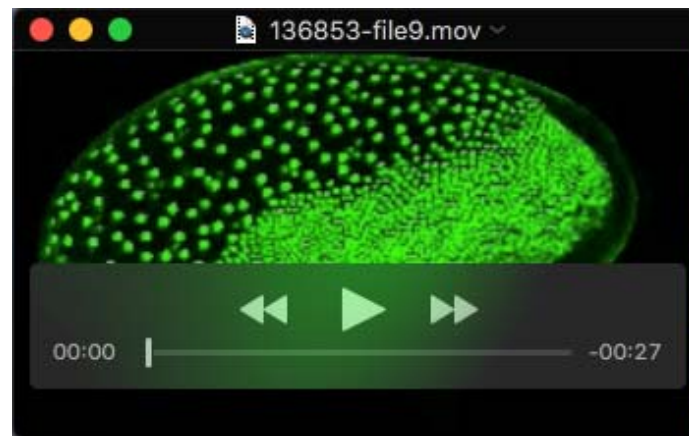

### Movie S3: Live imaging of early *Tc-maelstrom* RNAi embryo

12 hours Time-lapse fluorescence recording of a *Tribolium* embryo expressing nuclear-localized GFP under a ubiquitous promoter (transgenic line EFA-nGFP). Stacks were recorded every 12 minutes at 10x magnification and 20°C. Upon *Tc-mael* RNAi, head anlagen are expanded and less condensed as compared to wildtype. Serosa window formation remains incomplete to some degree and RNAi posterior elongation fails. Eventually, the serosa ruptures premature. Anterior to the left.
